# Supplementary material for: Repression of bacterial gene expression by antivitamin B 12 binding to a cobalamin riboswitch
Source: Royal Society of Chemistry journal article supplement (doi:10.1039/d5cb00308c), 2026-01-01
Supplement: d5cb00308c1.pdf [file d5cb00308c1.pdf]

## Repression of bacterial gene expression by antivitamin B<sub>12</sub> binding to a cobalamin riboswitch

Florian J. Widner<sup>a</sup>, Naziyat I. Khan<sup>b</sup>, Evelyne Deery<sup>b</sup>,  
Martin J. Warren<sup>b,c\*</sup>, Michiko E. Taga<sup>d\*</sup> and Bernhard Kräutler<sup>a\*</sup>

<sup>a</sup> Institute of Organic Chemistry & Center for Molecular Biosciences (CMBI), University of Innsbruck, 6020 Innsbruck (Austria)

<sup>b</sup> School of Biosciences, University of Kent, Canterbury, CT2 7NJ (UK)

<sup>c</sup> Quadram Institute Bioscience, Norwich Research Park, Norwich NR4 7UA (UK)

<sup>d</sup> Department of Plant and Microbial Biology, University of California, Berkeley, California (USA)

### Supplementary Information

#### *Materials:*

Water (H<sub>2</sub>O; purified over reverse osmosis); ddH<sub>2</sub>O (Millipore MiliQ Academic, HPLC gradient grade); acetonitrile (MeCN; methanol (MeOH) BDH prolabo, >99.9%, HPLC gradient grade). Crystalline adenosylrhodibalamine (**AdoRhl**) was prepared from chlororhodibalamine (**CIRhl**),<sup>[1]</sup> and spectroscopically identified, as described by Widner et al.<sup>[1-2]</sup> coenzyme B<sub>12</sub> (**AdoCbl**) from Fluka (>96% purity) was recrystallized from H<sub>2</sub>O/acetone; vitamin B<sub>12</sub> (**CNCbl**, ≥ 98%, from Merck) crystalline difluorophenylethynylcobalamin (**F2PhEtyCbl**) was prepared as in <sup>[3]</sup>; M9 glucose minimal medium (pH 7.4) contained: 2.6 g/L (NH<sub>4</sub>)<sub>2</sub>SO<sub>4</sub>, 1.0 g/L NH<sub>4</sub>Cl, 0.5 g/L NaCl, 15.0 g/L Na<sub>2</sub>HPO<sub>4</sub>·12 H<sub>2</sub>O, 3.0 g/L KH<sub>2</sub>PO<sub>4</sub>, 50.0 mg/L FeCl<sub>3</sub>·6 H<sub>2</sub>O, 65.0 mg/L EDTA Na<sub>2</sub>, 1.8 mg/L ZnSO<sub>4</sub>·7 H<sub>2</sub>O, 1.8 mg/L CuSO<sub>4</sub>·5 H<sub>2</sub>O, 1.2 mg/L MnSO<sub>4</sub>·H<sub>2</sub>O, 1.8 mg/L CoCl<sub>2</sub>·6 H<sub>2</sub>O, 2.0 mM MgSO<sub>4</sub>, 0.2 mM CaCl<sub>2</sub>, and 0.3 μM thiamine·HCl, 20 mM glucose as carbon source; components were prepared and sterilized separately and mixed under sterility: (1) phosphates, sodium chloride and ammonium. (2) iron chloride and edta, (3) copper, zinc, cobalt and manganese salts, (4) magnesium salt, (5) calcium salt and (6) glucose (see various discussions in [https://www.researchgate.net/post/Why\\_is\\_recombinant\\_Ecoli\\_not\\_growing\\_in\\_M9\\_minimal\\_media](https://www.researchgate.net/post/Why_is_recombinant_Ecoli_not_growing_in_M9_minimal_media)); all chemicals were bought from Merck or Fisher Scientific; cloning: Gibson Assembly® Master Mix from NEB, Zyppy™ plasmid Miniprep Kit, Zyppy DNA Clean & Concentrator™-25, DpnI digest kit (NEB), other restriction enzymes and T4 DNA ligase from Promega, PCR using FastStart High Fidelity from Merck, sequencing performed by Genewiz, Azenta Life Sciences; plates for plate reader assay: Costar 3603 (clear bottom, 96 well, sterile).

## Intracellular sensing experiments with fluorescence detection of red fluorescent protein (RFP)

### *Cloning and transformation of the reporter strain (pUC19-BtuB/RFP in MG1655):*

The BtuB riboswitch DNA <sup>[4]</sup> (promoter, riboswitch aptamer, expression platform and 210 nucleotides of the *btuB* coding sequence <sup>[5]</sup>) was amplified from chromosomal DNA of *E.coli* MG1655 by PCR. The BtuB riboswitch DNA and the RFP DNA <sup>[6]</sup> were combined and inserted into pUC19 by Gibson assembly, in order to generate a DNA strand with a comparable sequence topology as published <sup>[6]</sup>. The assembled sequence was confirmed by Sanger sequencing of the inserted DNA. The construct pUC19-BtuB/RFP was transformed into calcium competent MG1655 cells and selected on LB agar containing ampicillin (100 mg/L).

### *Preparing a culture for the riboswitch fluorescence assay:*

A frozen glycerol stock was used to streak *E.coli* MG1655 strain containing pUC19-BtuB/RFP on a plate (LB Agar ampicillin plate, 37 °C). Starting from one colony an overnight culture in M9 glucose media at 37°C was grown until the optical density at 600 nm (O.D.<sub>600</sub>) reached 1.1. The culture was diluted 1/100 in M9 glucose. The diluted culture was grown at 37°C until O.D.<sub>600</sub> reached 0.04 (approx. 2 hours).

### *E. coli fluorescence measurements:*

Fluorescence of RFP was measured using a BioTek Synergy 2 plate reader with excitation at 530 nm and emission measured at 590 nm. The samples contained: 96 µl of fresh M9 Media, 100 µl of culture (OD = 0.04), 4 µl of corrinoid solution. The plate was incubated at 37°C for 16 h with lid until the fluorescence was measured. Two experiments were done in triplicate on different days starting from different colonies.

Concentrations in solution medium of tested B<sub>12</sub>-analogs:

- **AdoCbl [nM]:** 0, 2.54 \*10<sup>-3</sup>, 7.62\*10<sup>-3</sup>, 22.9\*10<sup>-3</sup>, 68.6\*10<sup>-3</sup>, 0.206, 0.617, 1.85, 5.56, 16.7, 50.0, 500 (see main part Fig. 2, top)
- **AdoRhbl [nM]:** 0, 2.54\*10<sup>-3</sup>, 7.62\*10<sup>-3</sup>, 22.9\*10<sup>-3</sup>, 68.6\*10<sup>-3</sup>, 0.206, 0.617, 1.85, 5.56, 16.7, 50.0, 500 (see main part Fig. 2, bottom)
- **F2PhEtyCbl [nM]:** 0, 0.305, 0.914, 2.743, 8.23, 24.7, 74.1, 222, 667, 2.00\*10<sup>3</sup>, 6.00\*10<sup>3</sup>, 20.0\*10<sup>3</sup> (see below, Fig. S1)

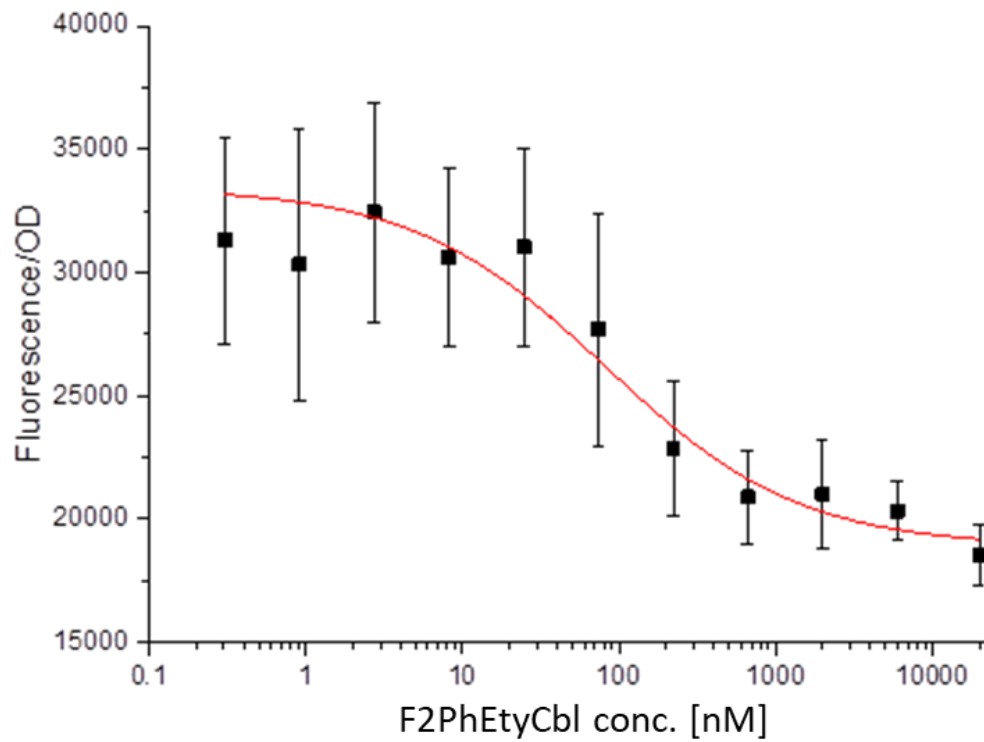

**Figure S1.** Fluorescence measurement using reporter strain MG1655 containing pUC19-BtuB-RFP and with **F2PhEtyCbl** as ligand, The dependence of the RFP readout on the concentration of the added corrinoid resulted in an  $EC_{50} = 181$  nM ( $St_{dev} = 139$  nM)

## ‘*In-vitro*’ experiment with detection of eGFP - procedures and data

### Preparation of a riboswitch-controlled reporter gene construct, ‘Rib70\_eGFP\_pET14b’

The *btuB* riboswitch containing the first 70 codons of the *btuB* gene was amplified from *E. coli* K12 MG1655 genomic DNA using the Rib\_For and Rib70\_Rev primers, synthesized by Invitrogen (Table S1). The PCR-amplified sample was run on a 1% agarose gel, the appropriate approximate 460 bp band was extracted and the DNA was purified from the agarose, before digesting with XbaI/NdeI restriction enzymes. The use of these particular restriction enzymes allows the fragment to be cloned downstream of the T7 promoter in the pET14b vector that housed an eGFP (eGFP-pET14b), before the start codon of the eGFP reporter gene. A ligation between the XbaI/NdeI digested riboswitch (insert) and XbaI/NdeI digested eGFP-pET14b (vector) DNA was furnished the complete plasmid, called Rib70\_eGFP\_pET14b (Figure S2).

### Cloning strategy for the construction of the Rib70\_eGFP\_pET14b plasmid

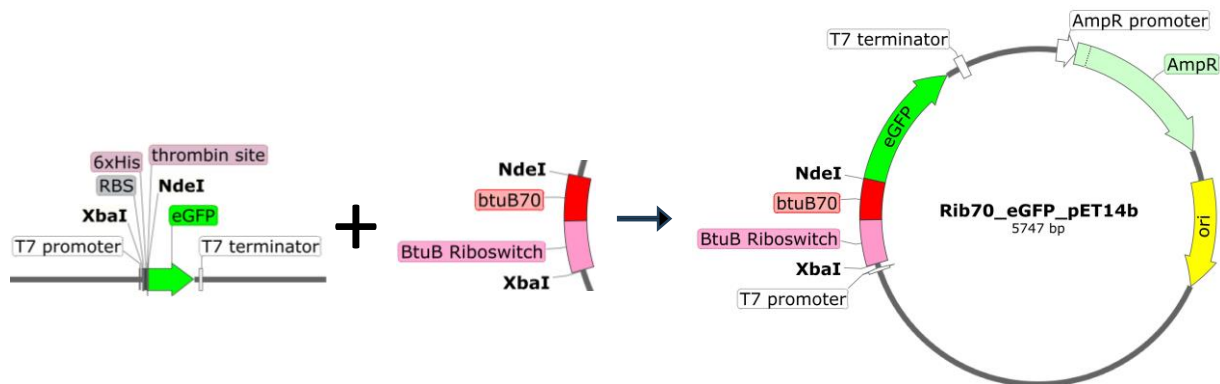

**Figure S2.** Cloning strategy for the construction of the Rib70\_eGFP\_pET14b plasmid (SnapGene was used to make this figure). Insertion of the amplified riboswitch fragment (Riboswitch + *btuB70*) into eGFP-pET14b was carried out using XbaI and NdeI restriction sites. Rib70\_eGFP\_pET14b contains Riboswitch-*btuB70* upstream of the eGFP reporter gene under the control of a T7 promoter and terminator. The plasmid also contains an ampicillin resistance gene, *AmpR* and its promoter, AmpR promoter, for selection purposes.

**Table S1.** Sequences used here for the Rib\_For and Rib70\_Rev primers

|           |                                           |      |
|-----------|-------------------------------------------|------|
| Rib_For   | GCT TCT AGA GCC GGT CCT GTG AGT TAA TAG G | XbaI |
| Rib70_Rev | GAT CAT ATG CGG AAG ACG GCG CAG CAC       | NdeI |

### ***In vitro* transcription/translation using the PURExpress (#E6800, New England Biolabs) *in vitro* protein synthesis kit**

Plasmid DNA samples were purified following the Qiagen minipreps kit protocol, except that they were eluted in 25  $\mu$ L of 10 mM Tris-Cl at pH 8.5 instead of 50  $\mu$ L. The lower elution volume allowed the DNA samples to be more concentrated. The concentration was measured on a NanoVue spectrophotometer (GE Healthcare).

Reactions were performed as described in the NEB manual ( [https://www.neb.com/en-gb/-/media/nebus/files/manuals/manuale6800\\_e3313\\_e6840\\_e6850.pdf?rev=60ba1e078b384d21bf0d5bbfd00495b9&hash=961278C162D92975A553D135BEDD3CCC](https://www.neb.com/en-gb/-/media/nebus/files/manuals/manuale6800_e3313_e6840_e6850.pdf?rev=60ba1e078b384d21bf0d5bbfd00495b9&hash=961278C162D92975A553D135BEDD3CCC)).

Briefly, the following reaction was assembled on ice: 10  $\mu$ L of solution A, 7.5  $\mu$ L of solution B, either 2.5  $\mu$ L of nuclease-free water or 2.5  $\mu$ L of B<sub>12</sub>/B<sub>12</sub> variant and 5  $\mu$ L of plasmid DNA at 150 ng/ $\mu$ L. The reaction was incubated at 37°C for 4 hours and finally stopped by transferring the tube on ice. 5  $\mu$ L of reaction mix was then loaded onto a 12.5% SDS PAGE or was analysed by fluorescence.

### **Quantification of eGFP by densitometry**

The SDS-PAGE was subjected to western blot analysis using the Mouse anti-GFP antibody (Merck) as primary antibody and the Anti-mouse IgG (H+L), AP Conjugate (Promega) as secondary antibody. The Alkaline phosphatase activity was revealed using 5-bromo-4-chloro-3-indolyl phosphate/nitro blue tetrazolium (BCIP/NBT) (Merck). The eGFP concentrations were analyzed by densitometry of eGFP production (see Fig. S3). Four concentrations of eGFP (4  $\mu$ M, 2  $\mu$ M, 1  $\mu$ M and 0.5  $\mu$ M) were also subjected to western blot analysis to generate a calibration curve. Densitometry analysis was carried out using ImageJ software.

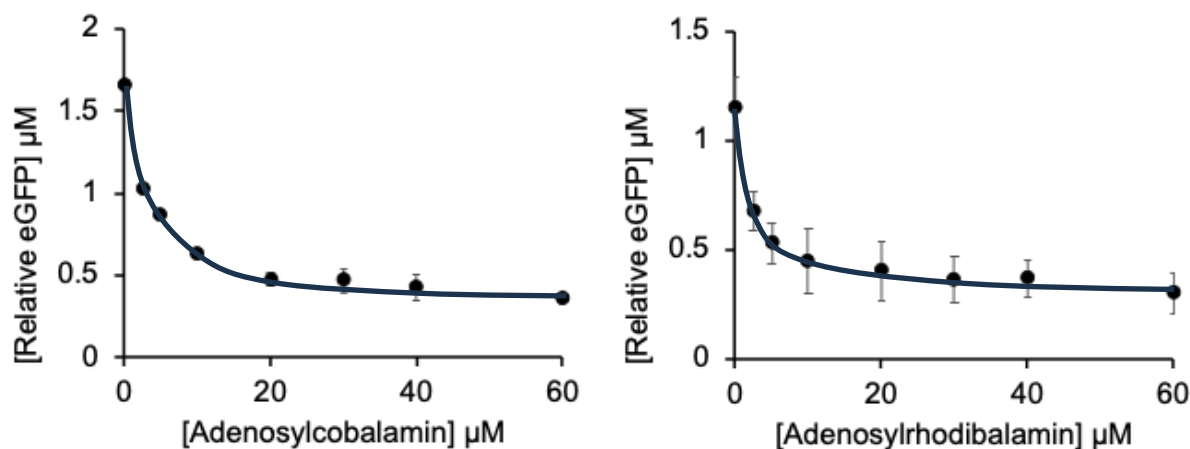

**Fig. S3.** Graphs showing the effect of increasing **AdoCbl** concentration (left) and **AdoRhbl** concentration (right) on *btuB* riboswitch-controlled eGFP-production, analyzed by densitometry. From curve-fitting, using 1:1 binding isotherm models, For **AdoCbl**, an EC<sub>50</sub> value of 3.1  $\mu$ M (+/- 0.3  $\mu$ M) was estimated, for **AdoRhbl** an EC<sub>50</sub> value of 1.9  $\mu$ M (+/- 0.2  $\mu$ M).

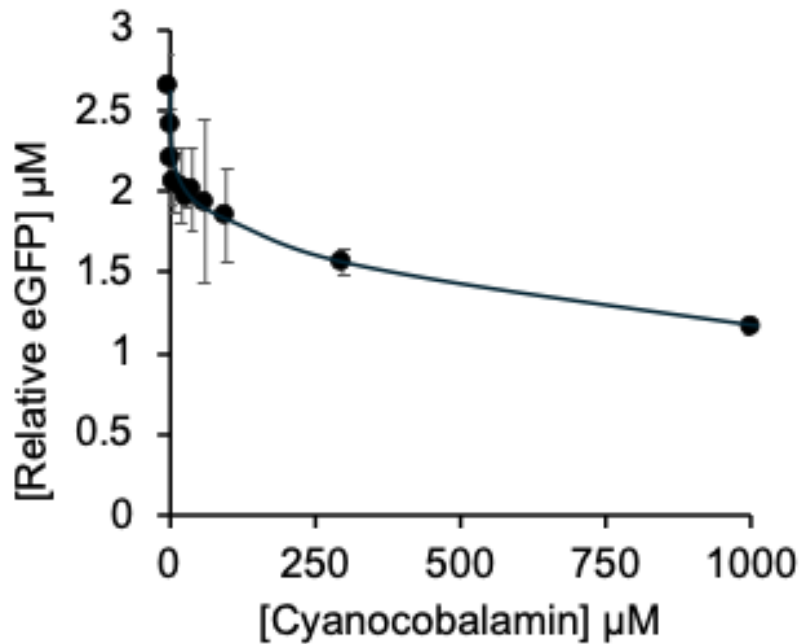

**Fig. S4a.** Graph showing the effect of increasing **CNCbl** concentration on *btuB* riboswitch-controlled eGFP production, monitored by densitometry. From curve fitting, using 1:1 binding isotherm models, an  $\text{EC}_{50}$  value of  $77.3 \mu\text{M}$  ( $\pm 39.2 \mu\text{M}$ ) was determined for **CNCbl**.

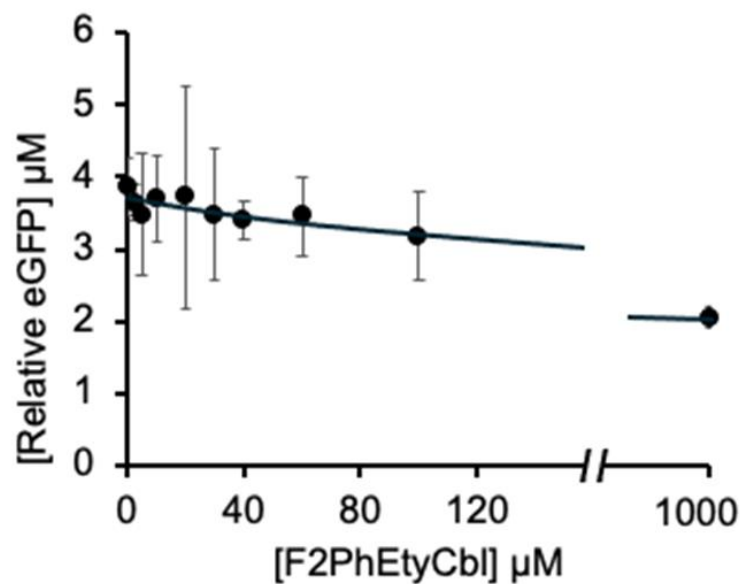

**Fig. S4b.** Graph showing the effect of increasing **F2PhEtyCbl** concentration on *btuB* riboswitch-controlled eGFP production, monitored by densitometry. From curve fitting, using 1:1 binding isotherm models, an  $\text{EC}_{50}$  value of  $340 \mu\text{M}$  was estimated for **F2PhEtyCbl**.

## Quantification of eGFP by fluorescence

eGFP was directly measured by the fluorescence emitted at 510 nm after an excitation at 488 nm, using a Perkin Elmer Luminescence Spectrometer LS50B. 5 different concentrations of eGFP were measured in the presence of 8 different concentrations of **AdoCbl** (0, 0.25, 0.5, 1, 2, 3, 4, 6  $\mu$ M) in order to generate a calibration curve (see main part, Fig. 4).

**Table S2. Comparison of EC<sub>50</sub> and A<sub>M</sub> values for the investigated corrinoids.** Values of EC<sub>50</sub> (concentration of corrinoid ligand when half of the inhibition is observed) and of A<sub>M</sub> (maximal extent of inactivation) obtained from fluorescence and densitometry analysis for **AdoCbl**, **AdoRhbl** and **CNCbl**.

| A comparison between different B <sub>12</sub> variants on their effect on the <i>E. coli</i> <i>btuB</i> riboswitch |                    |                             |                                           |                    |
|----------------------------------------------------------------------------------------------------------------------|--------------------|-----------------------------|-------------------------------------------|--------------------|
| Cobalamin type                                                                                                       | Method of Analysis | EC <sub>50</sub> ( $\mu$ M) | Standard Error for EC <sub>50</sub> value | A <sub>M</sub> (%) |
| AdoCbl                                                                                                               | Fluorescence       | 0.8                         | +/- 0.1                                   | 82                 |
| AdoCbl                                                                                                               | Densitometry       | 3.1                         | +/- 0.3                                   | 82                 |
| AdoRhbl                                                                                                              | Fluorescence       | 2.8                         | +/- 0.7                                   | 73                 |
| AdoRhbl                                                                                                              | Densitometry       | 1.9                         | +/- 0.2                                   | 78                 |
| CNCbl                                                                                                                | Fluorescence       | 31.4                        | +/- 5.2                                   | 63                 |
| CNCbl                                                                                                                | Densitometry       | 77.3                        | +/- 39.2                                  | 54                 |

## Supplementary chemical formulae

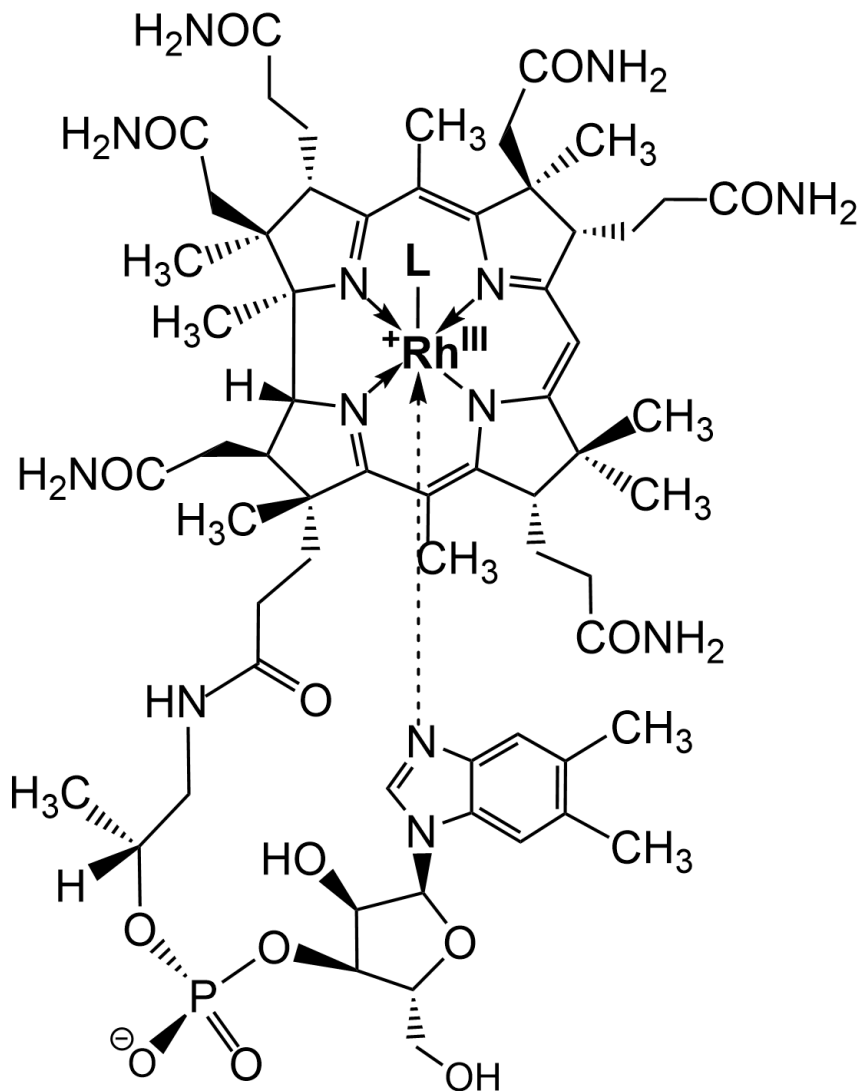

L = Cl: chlororhodibalamin (**CIRhbl**)

L = acetyl: acetylrhodibalamin (**AcRhbl**)

**Figure S5a.** Supplementary chemical formulae of chlororhodibalamin (**CIRhbl**) <sup>[1]</sup> and acetylrhodibalamin (**AcRhbl**) <sup>[7]</sup>



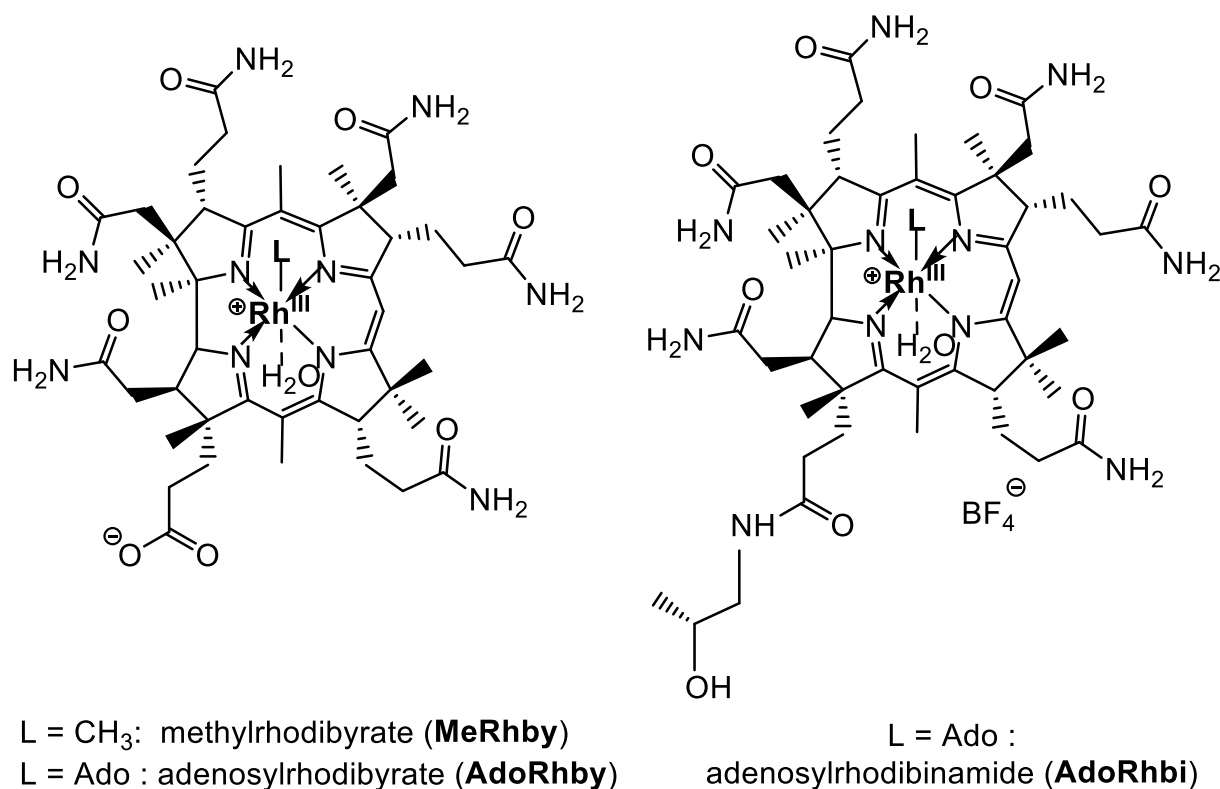

**Figure S5b.** Chemical formulae (left) of the rhodibyrates methylrhodibyrate (**MeRhby**)<sup>[8]</sup> and adenosylrhodibyrate (**AdoRhby**)<sup>[2, 9]</sup> and (right) of adenosylrhodibinamide tetrafluoroborate (**AdoRhbi**).<sup>[8]</sup>

## References

- [1] F. J. Widner, C. Kieninger, K. Wurst, E. Deery, M. J. Warren, B. Kräutler, *Synthesis* **2021**, 53, 332–337.
- [2] F. J. Widner, A. D. Lawrence, E. Deery, D. Heldt, S. Frank, K. Gruber, K. Wurst, M. J. Warren, B. Kräutler, *Angew. Chem. Int. Ed.* **2016**, 55, 11281–11286.
- [3] M. Ruetz, A. Shanmuganathan, C. Gherasim, A. Karasik, R. Salchner, C. Kieninger, K. Wurst, R. Banerjee, M. Koutmos, B. Kräutler, *Angew. Chem. Int. Ed.* **2017**, 56, 7387–7392.
- [4] A. Nahvi, J. E. Barrick, R. R. Breaker, *Nucl. Acids Res.* **2004**, 32, 143–150.
- [5] C. V. Franklund, R. J. Kadner, *J. Bacteriol.* **1997**, 179, 4039–4042.
- [6] C. C. Fowler, E. D. Brown, Y. F. Li, *Chem. & Biol.* **2010**, 17, 756–765.
- [7] M. Wiedemair, C. Kieninger, K. Wurst, M. Podewitz, E. Deery, M. D. Paxhia, M. J. Warren, B. Kräutler, *Helv Chim Acta* **2023**, 106, e202200158.
- [8] F. J. Widner, C. Kieninger, B. Kraeutler, *J. Porph. Phthal.* **2025**, 29, 408–417.
- [9] M. Ruetz, R. Mascarenhas, F. Widner, C. Kieninger, M. Koutmos, B. Kräutler, R. Banerjee, *Biochemistry* **2024**, 63 1955–1962.
